31

32 **Abstract**

33 Pathways of transmission of coronavirus (COVID-19) disease in the human population are  
34 still emerging. However, empirical observations suggest that dense human settlements are the  
35 most adversely impacted, corroborating a broad consensus that human-to-human transmission  
36 is a key mechanism for the rapid spread of this disease. Here, using logistic regression  
37 techniques, estimates of threshold levels of population density were computed corresponding  
38 to the incidence in the human population. Regions with population densities greater than  
39 3000 person per square mile in the United States have about 95% likelihood to get infected  
40 with COVID-19. Since case numbers of COVID-19 dynamically changed each day until  
41 November 30, 2020, ca. 4% of US counties were at 50% or higher risk of COVID-19  
42 transmission. While threshold on population density is not the sole indicator for  
43 predictability of coronavirus in human population, yet it is one of the key variables on  
44 understanding and rethinking human settlement in urban landscapes.

45

46 **Plane language Summary:** Population density is certainly one of the key factors influencing  
47 the transmission of infectious diseases like COVID-19. It is approximated that in continental  
48 United States, population density of 1192 per square mile and higher presents 50%  
49 probability of getting infected with COVID-19.

50

51 **Keywords:** threshold, population density, logistic regression, COVID-19.

52

53

54

55

56

## 57 **1.Introduction**

58 Severe Acute Respiratory Syndrome caused by Coronavirus (SARS-CoV-2 thereafter) is a  
59 respiratory lung infection, and as of April 28, 2021, there have been more than 148 million  
60 (WHO COVID-19 Dashboard, <https://covid19.who.int/>) confirmed human cases in the  
61 world. The SARS-CoV-2 virus remains highly infectious and is circulating in the human  
62 population at an alarming rate with anticipated variants in near future. An emerging  
63 disciplinary consensus is that seasonal variation may lead to cyclical outbreaks in the human  
64 population(Carlson, Gomez, Bansal, & Ryan, 2020; Merow & Urban, 2020). As with all  
65 airborne respiratory infectious diseases, the transmission of SARS-CoV-2 is high in densely  
66 populated urban regions of the world (Cruickshank, 1939; Robinson, Stilianakis, &  
67 Drossinos, 2012). However, thresholds of population density relative to the outbreak of the  
68 disease in humans remains unknown. The relative importance of knowledge of threshold on  
69 population density with reference to infectious disease such as COVID-19 is important for  
70 the future of modern cities and urban landscapes in the USA, given about 71% of the  
71 population reside in urbanized areas with an average density of 2534 persons per square mile  
72 ([https://www.census.gov/programs-surveys/geography/guidance/geo-areas/urban-rural/ua-](https://www.census.gov/programs-surveys/geography/guidance/geo-areas/urban-rural/ua-facts.html)  
73 [facts.html](https://www.census.gov/programs-surveys/geography/guidance/geo-areas/urban-rural/ua-facts.html)).

74 Influenza transmission dynamics, which allow parallel comparison with COVID-19  
75 transmission, depend on several socio-demographic factors (such as race, income level,  
76 education, and location), but population density remains a critical variable for controlling  
77 an outbreak of seasonal influenza (Atkinson & Wein, 2008; Merler & Ajelli, 2010). While  
78 the severity of airborne contagion cannot be attributed solely to population density(Li,  
79 Richmond, & Roehner, 2018), the knowledge of thresholds on population density can  
80 be helpful in understanding the spatial distribution with respect to the risk

81 of disease(Chandra, Kassens-Noor, Kuljanin, & Vertalka, 2013; Grantz et al., 2016).  
82 Intuitively, high population density is concluded to favor contagion and vice-versa. However,  
83 non-uniform distribution of a population can yield inconclusive results (Li et al., 2018).  
84 While the significant association was reported between population density and  
85 transmissibility for the 1918 influenza pandemic in Chicago (Grantz et al., 2016), the average  
86 influenza attack rates decreased with increasing population density in Japan (Hoyle &  
87 Wickramasinghe, 1990). In the context of COVID-19, an analysis of Brazilian data  
88 suggests the general increase in COVID-19 cases was associated with highly populated  
89 regions(Pequeno et al., 2020). There is no study to date that provides an exploratory  
90 association of population density thresholds with COVID-19 cases in the continental USA.

91 This study was undertaken to determine thresholds on population density that can be used to  
92 estimate the probable risk of infection from COVID-19. Estimation of a threshold  
93 population density would allow in the differentiation of low and high-risk regions and offer  
94 useful input for planning, designing, and targeting public health interventions. Also,  
95 identifying specific regions where greater surveillance is required to contain the disease  
96 would be enhanced and can be used to define the expansion of urbanized areas in the USA.

## 97 **2. Methods**

98 Daily incidence data for COVID-19 cases in the 3,107 mainland U.S. counties were obtained  
99 from the GitHub project (<https://github.com/nytimes/covid-19-data>) from March 15, 2020, to  
100 November 30, 2020. The time period was selected based on the non-availability of vaccines  
101 since vaccines will mask the limit on population densities. Data on the population densities  
102 of each U.S. county were obtained from the U.S. Census Bureau (2019)  
103 (<https://www.census.gov/data/datasets/time-series/demo/popest/2010s-counties-total.html>).  
104 Land area in square miles was obtained from the U.S. Census Bureau  
105 (<https://www.census.gov/library/publications/2011/compendia/usa-counties->

2011.html#LND). An ordinal logistic regression model was employed to study the dependency of COVID-19 cases (thereafter cases) on counties' population density. It was assumed that the population densities remained constant during the study period, implying population mobility has minimal impact on population density. Further, the population was assumed to be uniformly distributed over the county. Since the number of cases differs widely over the county, intuitively, it is preferable to classify cases into a number of classes where each class explicitly implies a specific infection risk. To classify cases, we estimated the percentile of cumulative cases at an interval of 15 days beginning March 15, 2020, to November 30, 2020. Cumulative cases data were divided into three categories (or events): (a) low number of cases (up to 80th percentile); (b) medium number of cases (80th to 95th percentile); and (c) high number of cases (greater than 95th percentile). The 80<sup>th</sup> percentile case on November 30, 2020 was 3817 (Table 1), which can still be considered relatively less compared to the number of cases in high-risk locations.

**Table 1:** Biweekly 80<sup>th</sup> percentile cases of low cases

| <b>Date</b>       | <b>80th percentile cases</b> |
|-------------------|------------------------------|
| March 15 2020     | 0                            |
| March 31 2020     | 15                           |
| April 15 2020     | 63                           |
| April 30 2020     | 126                          |
| May 15 2020       | 196                          |
| May 31 2020       | 271                          |
| June 15 2020      | 351                          |
| June 30 2020      | 480                          |
| July 15 2020      | 670                          |
| July 31 2020      | 970                          |
| August 15 2020    | 1175                         |
| August 31 2020    | 1382                         |
| September 14 2020 | 1564                         |
| September 30 2020 | 1787                         |
| October 15 2020   | 2069                         |
| October 31 2020   | 2410                         |
| November 15 2020  | 3036                         |
| November 30 2020  | 3817                         |

121 Moreover, a higher value for the log-likelihood (a statistical metric used for model selection)  
122 in Table 2, justifies the choice of the 80th percentile. In fact, the log-likelihood function was  
123 found to be better with increasing percentile, with the increase being less for the percentiles  
124 above the value of 80.

125 **Table 2:** Variation in log-likelihood in COVID-19 cases

| <b>Percentile up to which cases were considered low</b> | <b>log likelihood</b> |
|---------------------------------------------------------|-----------------------|
| 33                                                      | -3070.07              |
| 50                                                      | -2860.07              |
| 80                                                      | -1634.02              |
| 85                                                      | -1364.49              |

126 Thus, the ‘reasonable’ choice of percentiles for classification of cases will lead to overall  
127 similar model results without altering the final interpretation.. The following paragraph  
128 briefly explains the analysis approach. Relevant theory for the application of ordinal logistic  
129 regression is detailed in the supplementary section.

130 The predictor used is the county population density which is the county's population per unit  
131 of the county's land area. The response variable, which is ordinal in nature, is the cumulative  
132 case count classified into low, medium, and high (based on percentiles). Logit link function  
133 (details in supplementary section) was used to express the dependent variable as a linear  
134 function of the independent variables. Link function also relates the response (ordinal cases)  
135 to linear predictor (population density) and transforms the probabilities of ordinal response to  
136 the continuous scale [0,1]. The regression equations, thus, take the form as follows:

137 
$$\ln \left( \frac{p(\text{high cases})}{1-p(\text{high cases})} \right) = \alpha_1 + \beta * \text{population density} [1]$$

138 
$$\ln \left( \frac{p(\text{medium cases})}{1-p(\text{medium cases})} \right) = \alpha_2 + \beta * \text{population density} [2]$$

139

140 where  $p(\text{high cases})$  and  $p(\text{medium cases})$  are the probabilities of high and medium cases,  
141 respectively. Constants and coefficients in the equations (1, 2) were estimated using the  
142 maximum likelihood estimation methods. Since the total probabilities sum up to one, the  
143 probability of a low number of cases were estimated by subtracting the probability of high  
144 and medium cases.

### 145 **3. Results and discussion**

146 We start our analysis with results obtained from logistical regression models (Figure 1)  
147 showing three critical statistical metrics (Somers D, Goodman-Kruskal Gamma and Percent  
148 Concordant pairs).

149

150

151 High values of measures of association ( $> 82\%$ ), i.e., percentage of concordant pairs,  
152 Somers's D and Goodman-Kruskal Gamma, signify that the performance of ordinal logistic  
153 model is satisfactorily. On average, model performance remained constant since start of  
154 collection of data on COVID-19 human cases. The p-values for each constant and predictor  
155 population density were less than 0.05 (not shown), thus establishing statistical significance.  
156 The p-value for the test of all slopes is zero (Table S1), which indicates the predictor  
157 population density has a statistically significant relationship with the response variable  
158 (COVID-19 cases). The deviance goodness of fit result ( $p>0.05$ ), for all dates for which the  
159 model was run, showed adequate fit for the data, and the associated probabilities do not  
160 deviate significantly from observed values (detailed inference of model performance  
161 indicators for November 15, 2020 is presented in Table S1 in supplementary section). The  
162 model results for any one day should sufficiently explain the behavior of event probability  
163 (cases) with population density. The plots in Figure 2 show average probability of high,  
164 medium, and low number of cases.

165

166

167 Average probabilities were defined as the mean of the probabilities obtained from the ordinal  
168 logistic regression models for each of the eighteen bi-weekly cases (from March 15, 2020, to  
169 November 30, 2020). The monotonic nature of Figure 2(a) shows that with an increasing  
170 population density, the probability of a high number of cases increases, and vice versa. The  
171 probability rises steeply to a nearly constant value of 1 at a population density of ca. 5000 per  
172 square mile, suggesting larger population densities greater than this value were remarkably  
173 associated with the corresponding high number of COVID-19 cases. The implication is that  
174 the pronounced effect of high population density and a proportional number of cases was  
175 sufficient to establish population density as an important factor in transmission potential of  
176 this disease . The results suggest that in densely populated areas, it may be challenging to  
177 follow social distancing norms, thus an increased number of COVID-19 human cases were to  
178 be expected. Figure 2(c) shows the probability of a low number of cases, a trend opposite to  
179 that for high number of cases. The probability continuously decreases to a constant value  
180 close to zero, signifying that as population density increases, the chance of a low number of  
181 cases decreases. Figure 2(b) illustrates the medium number of cases with population density.  
182 The maximum probability of the medium number of cases is ca. 0.48, corresponding to the  
183 population density of ca. 1,190 per square mile. Thus, a decrease in population density from  
184 1,190 per square mile decreases the probability of a medium number of cases as the  
185 probability of low number of cases increase. On the other hand, if population density beyond  
186 1,190 per square mile, the probability for a medium number of cases decreases since  
187 probability of high number of cases increase thereafter. Population density of 1,190 people  
188 per square mile can be interpreted as a transition from low to high COVID-19 cases. Figure 3  
189 illustrates changes in event probabilities over time and suggests that even low-density



190 counties are likely to be more vulnerable as the probability of high number of COVID-19  
191 cases for population density increases over time.

192

193 In Figure 2(a), the threshold population density is shown at which a 50% chance of a high  
194 number of cases will occur, ca. 1,622 per square mile. The population density for getting a  
195 low number of cases at 50% chance is 762 per square mile (Figure 2(c)) , and the arithmetic  
196 mean of these two values at high and low cases gives an average of 1,192 per square mile  
197 and defined as the population density at which there is a 50% chance of infection. Thus,  
198 4.02% (125 of 3,107) of the counties with population density greater than 1,192 per square  
199 mile are at 50% or greater risk of infection as on November 30,2020. The key results  
200 discussed here are concisely summarized in Table 3.

201

202

203 **Table3:** Key results of Population density- cases analysis

| Attribute                                                                     | Value                  |
|-------------------------------------------------------------------------------|------------------------|
| Population density beyond which 95% probability of high number of cases       | 3000 per square mile   |
| Population density beyond which 50% probability of high number of cases       | 1622 per square mile   |
| Average Population density beyond which 50% probability of getting infected   | 1192 per square mile   |
| Percentage of US counties at greater than 50% probability of getting infected | 4.02%(125 out of 3107) |

204

205 Table 4 provides values for population density and arithmetic average probability of high  
206 number of cases for each state in the US, as of November 30, 2020.

207

208

209  
210  
211  
212  
213  
214  
215  
216  
217  
218

**Table 4:** Probabilities of high number of COVID19 cases as of November 30, 2020

| <b>State</b>         | <b>Population density (per square mile)</b> | <b>Average probability of high cases (Ap)</b> | <b>Maximum probability of high cases (Map)</b> | <b>Minimum probability of high cases (Minp)</b> | <b>Rank of Ap</b> | <b>Rank of Map</b> | <b>Percent difference between Map and Ap</b> |
|----------------------|---------------------------------------------|-----------------------------------------------|------------------------------------------------|-------------------------------------------------|-------------------|--------------------|----------------------------------------------|
| District of Columbia | 11569.7                                     | 1                                             | 1                                              | 1.000                                           | 1                 | 1                  | 0                                            |
| New Jersey           | 1207.8                                      | 0.404                                         | 1                                              | 0.027                                           | 2                 | 1                  | 60                                           |
| Rhode Island         | 1024.5                                      | 0.28                                          | 0.652                                          | 0.043                                           | 3                 | 23                 | 57                                           |
| Massachusetts        | 883.5                                       | 0.242                                         | 1                                              | 0.022                                           | 4                 | 1                  | 76                                           |
| Connecticut          | 736.6                                       | 0.156                                         | 0.421                                          | 0.028                                           | 7                 | 27                 | 63                                           |
| Maryland             | 622.9                                       | 0.165                                         | 1                                              | 0.019                                           | 6                 | 1                  | 84                                           |
| Delaware             | 499.6                                       | 0.144                                         | 0.368                                          | 0.030                                           | 8                 | 29                 | 61                                           |
| New York             | 412.8                                       | 0.099                                         | 1                                              | 0.017                                           | 11                | 1                  | 90                                           |
| Florida              | 400.7                                       | 0.078                                         | 0.981                                          | 0.018                                           | 13                | 14                 | 92                                           |
| Pennsylvania         | 286.1                                       | 0.079                                         | 1                                              | 0.018                                           | 12                | 1                  | 92                                           |
| Ohio                 | 286.1                                       | 0.066                                         | 0.927                                          | 0.019                                           | 14                | 18                 | 93                                           |

|                |       |       |       |       |    |    |    |
|----------------|-------|-------|-------|-------|----|----|----|
| California     | 253.7 | 0.12  | 1     | 0.017 | 10 | 1  | 88 |
| Illinois       | 228.2 | 0.047 | 0.999 | 0.018 | 18 | 10 | 95 |
| Hawaii         | 220.3 | 0.121 | 0.52  | 0.018 | 9  | 26 | 77 |
| Virginia       | 216.1 | 0.232 | 1     | 0.018 | 5  | 1  | 77 |
| North Carolina | 215.7 | 0.041 | 0.711 | 0.018 | 20 | 20 | 94 |
| Indiana        | 187.9 | 0.038 | 0.857 | 0.018 | 24 | 19 | 96 |
| Georgia        | 184.6 | 0.051 | 0.93  | 0.018 | 15 | 17 | 95 |
| Michigan       | 176.7 | 0.048 | 0.944 | 0.018 | 17 | 16 | 95 |
| South Carolina | 171.2 | 0.027 | 0.077 | 0.018 | 32 | 35 | 65 |
| Tennessee      | 165.6 | 0.031 | 0.346 | 0.018 | 28 | 30 | 91 |
| New Hampshire  | 151.9 | 0.029 | 0.053 | 0.018 | 31 | 39 | 45 |
| Washington     | 114.6 | 0.03  | 0.181 | 0.017 | 30 | 33 | 83 |
| Kentucky       | 113.1 | 0.031 | 0.706 | 0.018 | 28 | 21 | 96 |
| Texas          | 111   | 0.036 | 0.952 | 0.017 | 27 | 15 | 96 |
| Louisiana      | 107.6 | 0.04  | 0.689 | 0.018 | 22 | 22 | 94 |
| Wisconsin      | 107.5 | 0.038 | 0.993 | 0.018 | 24 | 12 | 96 |
| Alabama        | 96.8  | 0.022 | 0.071 | 0.018 | 37 | 36 | 69 |
| Missouri       | 89.3  | 0.037 | 0.999 | 0.018 | 26 | 10 | 96 |
| West Virginia  | 74.6  | 0.023 | 0.046 | 0.018 | 35 | 42 | 50 |
| Minnesota      | 70.8  | 0.043 | 0.984 | 0.017 | 19 | 13 | 96 |
| Vermont        | 67.7  | 0.021 | 0.036 | 0.018 | 39 | 46 | 42 |
| Arizona        | 64.1  | 0.021 | 0.053 | 0.018 | 39 | 39 | 60 |
| Mississippi    | 63.4  | 0.02  | 0.042 | 0.017 | 42 | 44 | 52 |
| Arkansas       | 58    | 0.02  | 0.059 | 0.018 | 42 | 38 | 66 |
| Oklahoma       | 57.7  | 0.025 | 0.225 | 0.017 | 33 | 32 | 89 |
| Iowa           | 56.5  | 0.021 | 0.118 | 0.018 | 39 | 34 | 82 |
| Colorado       | 55.6  | 0.049 | 1     | 0.017 | 16 | 1  | 95 |
| Oregon         | 43.9  | 0.039 | 0.637 | 0.017 | 23 | 24 | 94 |
| Maine          | 43.6  | 0.022 | 0.038 | 0.018 | 37 | 45 | 42 |

|              |      |       |       |       |    |    |    |
|--------------|------|-------|-------|-------|----|----|----|
| Utah         | 39   | 0.041 | 0.414 | 0.017 | 20 | 28 | 90 |
| Kansas       | 35.6 | 0.023 | 0.272 | 0.017 | 35 | 31 | 92 |
| Nevada       | 28.1 | 0.02  | 0.043 | 0.017 | 42 | 43 | 53 |
| Nebraska     | 25.2 | 0.025 | 0.527 | 0.017 | 33 | 25 | 95 |
| Idaho        | 21.6 | 0.019 | 0.048 | 0.017 | 46 | 41 | 60 |
| New Mexico   | 17.3 | 0.02  | 0.069 | 0.017 | 42 | 37 | 71 |
| South Dakota | 11.7 | 0.018 | 0.03  | 0.017 | 47 | 47 | 40 |
| North Dakota | 11   | 0.018 | 0.022 | 0.017 | 47 | 48 | 18 |
| Montana      | 7.3  | 0.018 | 0.02  | 0.017 | 47 | 49 | 10 |
| Wyoming      | 6    | 0.018 | 0.019 | 0.017 | 47 | 50 | 5  |

219

220 This average probability is the simple arithmetic average of the respective probabilities of  
 221 state counties. It is intuitive that the most densely populated states were also those with the  
 222 highest probability of a high number of cases, strengthening the finding that population  
 223 density is critical beyond a specific threshold. The average probability for a high number of  
 224 COVID-19 cases provides a number useful for conceptualizing the overall risk of infection in  
 225 a particular state. However, except for a few densely populated states, epicenter counties are  
 226 not highlighted. For example, on November 30, 2020, Texas, California, Florida, and Illinois  
 227 were States with the largest number of COVID-19 cases. From Table 4, it was obvious that  
 228 the relatively low values of average probabilities for those four states do not reflect their  
 229 epicenter status. Therefore, we defined the maximum average probability for a state which is  
 230 taken equal to the maximum value of average probabilities considering all the counties of a  
 231 state. Thus, the maximum average probability for each state as calculated. The high  
 232 probability of a high number of cases (>90%) indicated this metric performed acceptably to  
 233 rank a state as an epicenter. Exceptions were noted, where relatively low value of maximum  
 234 average probability of high cases was observed in low population density states having high  
 235 number of COVID-19 cases. This anomaly is a potential limitation of the logistical regression

236 methods, in dealing with locations with low population densities and high cases. However, it  
237 is understood that any regressive model considering population density as the single  
238 explanatory variable likely would fail to explain a high number of cases in less densely  
239 populated regions. Lastly, an important observation with reference to population density and  
240 case analysis can be discerned from Table 4, namely the percentage difference between the  
241 maximum and average probabilities of high number of cases, being very high for many states,  
242 notably those with high maximum average probabilities. This signifies that only a few  
243 counties of the state account for a large number of cases, and the state as a whole would not  
244 be an epicenter of COVID-19.

245

246 The analysis in our study assumes a uniform population distribution. In reality, the population  
247 is generally not distributed evenly across the county, as most of the population clusters in and  
248 around cities. The lack of a standard sub-county level case count, which rules out the  
249 possibility of conducting a more realistic city-level threshold analysis, forms a limitation of  
250 our study. Furthermore, though county population density is generally considered a reliable  
251 predictor to explain COVID-19 cases due to its high explanatory power (Riley, 2007; Wong  
252 & Li, 2020) , controlling it for other variables such as population size could bring valuable  
253 insights. to determine running thresholds on population density.

254

#### 255 **4. Conclusions and Implications on Future of urban cities**

256 The interrelationship of population density with the number of COVID-19 cases was  
257 analyzed, with the objective to determine thresholds for population density above which there  
258 was a 50% or greater risk of COVID-19 cases in humans. Population density and COVID-19  
259 cases, when analyzed together, suggest *ca.* 4% of the counties (shown in Figure 4) in the

260 United States would be at 50% or greater at risk of COVID-19 cases and confined to a few  
261 counties.

262

263

264 The thresholds provide useful information as a guide for policymakers. In combination with  
265 other governing factors, the population density threshold can provide a more decisive  
266 conclusion, notably for estimating cases and mitigating COVID-19 in human cases,  
267 especially for urban neighborhoods that are more likely heterogenous in race, income, and  
268 infrastructure (J. A. Maantay, Maroko, & Herrmann, 2007; J. Maantay & Maroko, 2009).  
269 Dense populations comprise sub-populations, namely communities of color and low-income  
270 communities that are vulnerable, e.g. poor housing, high pollution, lack of access to health  
271 care, and a higher rate of pre-existing conditions (Brulle & Pellow, 2006; Bullard, 2005;  
272 Pellow, 2000). Nevertheless, the relationship between population density and rates of  
273 infection is sufficiently robust that it can be employed by policymakers to prepare  
274 anticipatory plans for specific communities and thereby prevent the spread of infection and  
275 mitigate the effects of the disease.

276

## 277 **Data Availability**

278 Raw data sets are publicly available and can be accessed using weblinks provided.

279 Datasets generated in this study are available on openly accessible data servers.

280 <https://github.com/nytimes/covid-19-data>

281 <https://www.census.gov/data/datasets/time-series/demo/popest/2010s-counties-total.html>

282 <https://www.census.gov/library/publications/2011/compendia/usa-counties-2011.html#LND>

283

284 While there are many other links to get the data on COVID-19 case numbers, to the best of  
285 our knowledge, GitHub is the only concise yet comprehensive source which provides easy to  
286 analyze chronological case count data for US at county scale.

287

## 288 **Code Availability**

289 All the data analysis was performed using the MINITAB software package, a standard  
290 package for statistical analysis available at

291 <https://www.minitab.com/en-us/products/minitab/>

292

## 293 **References**

294 Atkinson, M., & Wein, L. (2008). Quantifying the Routes of Transmission for Pandemic

295 Influenza. *Bull Math Biol*, 70. <https://doi.org/10.1007/s11538-007-9281-2>

296 Brulle, R. J., & Pellow, D. N. (2006). Environmental justice: Human health and

297 environmental inequalities. *Annual Review of Public Health*, 27(102), 103–124.

298 <https://doi.org/10.1146/annurev.publhealth.27.021405.102124>

299 Bullard, R. (2005). Environmental justice in the 21st century. *Debating the Earth*.

300 Carlson, C. J., Gomez, A. C. R., Bansal, S., & Ryan, S. J. (2020). Misconceptions about

301 weather and seasonality must not misguide COVID-19 response. *Nature*

302 *Communications*, 11(1), 2–5. <https://doi.org/10.1038/s41467-020-18150-z>

303 Chandra, S., Kassens-Noor, E., Kuljanin, G., & Vertalka, J. (2013). A geographic analysis of

304 population density thresholds in the influenza pandemic of 1918-19. *International*

305 *Journal of Health Geographics*, 12, 1–10. <https://doi.org/10.1186/1476-072X-12-9>

306 Cruickshank, R. (1939). Air-borne infection and its prevention. *Public Health*, 53(C), 254–

307 255. [https://doi.org/10.1016/S0033-3506\(39\)80180-9](https://doi.org/10.1016/S0033-3506(39)80180-9)

- 308 Grantz, K. H., Rane, M. S., Salje, H., Glass, G. E., Schachterle, S. E., & Cummings, D. A. T.  
309 (2016). Disparities in influenza mortality and transmission related to sociodemographic  
310 factors within Chicago in the pandemic of 1918. *National Acad Sciences*, 29, 2020.  
311 <https://doi.org/10.5061/dryad.48nv3>
- 312 Hoyle, F., & Wickramasinghe, N. C. (1990). Influenza - evidence against contagion:  
313 Discussion paper. *Journal of the Royal Society of Medicine*, 83(4), 258–261.  
314 <https://doi.org/10.1177/014107689008300417>
- 315 Li, R., Richmond, P., & Roehner, B. M. (2018). Effect of population density on epidemics.  
316 *Physica A: Statistical Mechanics and Its Applications*, 510, 713–724.  
317 <https://doi.org/10.1016/j.physa.2018.07.025>
- 318 Maantay, J. A., Maroko, A. R., & Herrmann, C. (2007). Mapping Population Distribution in  
319 the Urban Environment: The Cadastral-based Expert Dasymmetric System (CEDS).  
320 *Cartography and Geographic Information Science*, 34(2), 77–102.  
321 <https://doi.org/10.1559/152304007781002190>
- 322 Maantay, J., & Maroko, A. (2009). Mapping urban risk : Flood hazards , race , &  
323 environmental justice in New York. *Applied Geography*, 29(1), 111–124.  
324 <https://doi.org/10.1016/j.apgeog.2008.08.002>
- 325 Merler, S., & Ajelli, M. (2010). The role of population heterogeneity and human mobility in  
326 the spread of pandemic influenza. *Proceedings of the Royal Society B: Biological*  
327 *Sciences*, 277(1681), 557–565. <https://doi.org/10.1098/rspb.2009.1605>
- 328 Merow, C., & Urban, M. C. (2020). Seasonality and uncertainty in global COVID-19 growth  
329 rates. *Proceedings of the National Academy of Sciences of the United States of America*,  
330 117(44), 27456–27464. <https://doi.org/10.1073/pnas.2008590117>



- 331 Pellow, D. N. (2000). Environmental Inequality Formation. *American Behavioral Scientist*,  
332 43(4), 581–601. <https://doi.org/10.1177/0002764200043004004>
- 333 Pequeno, P., Mendel, B., Rosa, C., Bosholn, M., Souza, J. L., Baccaro, F., ... Magnusson, W.  
334 (2020). Air transportation, population density and temperature predict the spread of  
335 COVID-19 in Brazil. *PeerJ*, 8, e9322. <https://doi.org/10.7717/peerj.9322>
- 336 Riley, S. (2007). Large-Scale Spatial-Transmission Models of Infectious Disease. *Science*,  
337 316(5829), 1298–1301. <https://doi.org/10.1126/science.1134695>
- 338 Robinson, M., Stilianakis, N. I., & Drossinos, Y. (2012). Spatial dynamics of airborne  
339 infectious diseases. *Journal of Theoretical Biology*, 297, 116–126.  
340 <https://doi.org/10.1016/j.jtbi.2011.12.015>
- 341 Wong, D. W. S., & Li, Y. (2020). Spreading of COVID-19: Density matters. *PLOS ONE*,  
342 15(12), e0242398. <https://doi.org/10.1371/journal.pone.0242398>
- 343 WHO Coronavirus (COVID-19) Dashboard. (2021). Retrieved April 28, 2021, from  
344 <https://covid19.who.int/>  
345  
346  
347  
348  
349  
350  
351
- 352 **References from the Supplementary section**
- 353 Hosmer, D. W., & Lemeshow, S. (2000). *Applied Logistic Regression (Wiley Series in*  
354 *Probability and Statistics)* (2nd ed.). <https://doi.org/10.1002/0471722146>

355 Methods and formulas for Ordinal Logistic Regression - Minitab. (2019). Retrieved October  
356 19, 2020, from [https://support.minitab.com/en-us/minitab/18/help-and-how-](https://support.minitab.com/en-us/minitab/18/help-and-how-to/modeling-statistics/regression/how-to/ordinal-logistic-regression/methods-and-formulas/methods-and-formulas/#measures-of-association)  
357 [to/modeling-statistics/regression/how-to/ordinal-logistic-regression/methods-and-](https://support.minitab.com/en-us/minitab/18/help-and-how-to/modeling-statistics/regression/how-to/ordinal-logistic-regression/methods-and-formulas/methods-and-formulas/#measures-of-association)  
358 [formulas/methods-and-formulas/#measures-of-association](https://support.minitab.com/en-us/minitab/18/help-and-how-to/modeling-statistics/regression/how-to/ordinal-logistic-regression/methods-and-formulas/methods-and-formulas/#measures-of-association).

359

360

361

362

363

364

### 365 **Author Contributions**

366 A.J. is responsible for the main concepts; Y.J. and M.G. wrote the study; Y.J., M.G., M.U.  
367 and A.J. carried out the analyses; C.Y.W., T.N. A.A. and R.C. prepared the final  
368 manuscript.

369

### 370 **Corresponding author**

371 Antarpreet Jutla

372

### 373 **Competing interests**

374 The authors declare no competing interests.

375

376

377

378

379

380

381

382

383

### 384 **List of figures**

385 Figure 1: Performance of logistical regression model on a biweekly scale for the entire US.

386 Figure 2: Average infection probability versus population density for (a) high (b) medium  
387 and (c) low number of cases

388 Figure 3. Plots show changes in the probability of (a) high (b)medium and (c) low number of  
389 cases.

390  
391 Figure 4: US counties with greater than, and less than 50% probability of COVID-19  
392 infection as of November 30 ,2020.

393  
394  
395

396

397

#### 398 **List of tables**

399 Table 1: Biweekly 80<sup>th</sup> percentile cases

400 Table 2: Variation in log likelihood for COVID-19 cases (November 30,2020)

401 Table 3: Key results of Population density- cases analysis

402 Table 4: Probabilities for high number of COVID19 cases ( as on November 30,2020)

403 Table S1: Results from the ordinal logistic regression model (November 15,2020)

404

405

406

407

408

409

410

411

412

413

414

415

416 **Figures:**

417

418

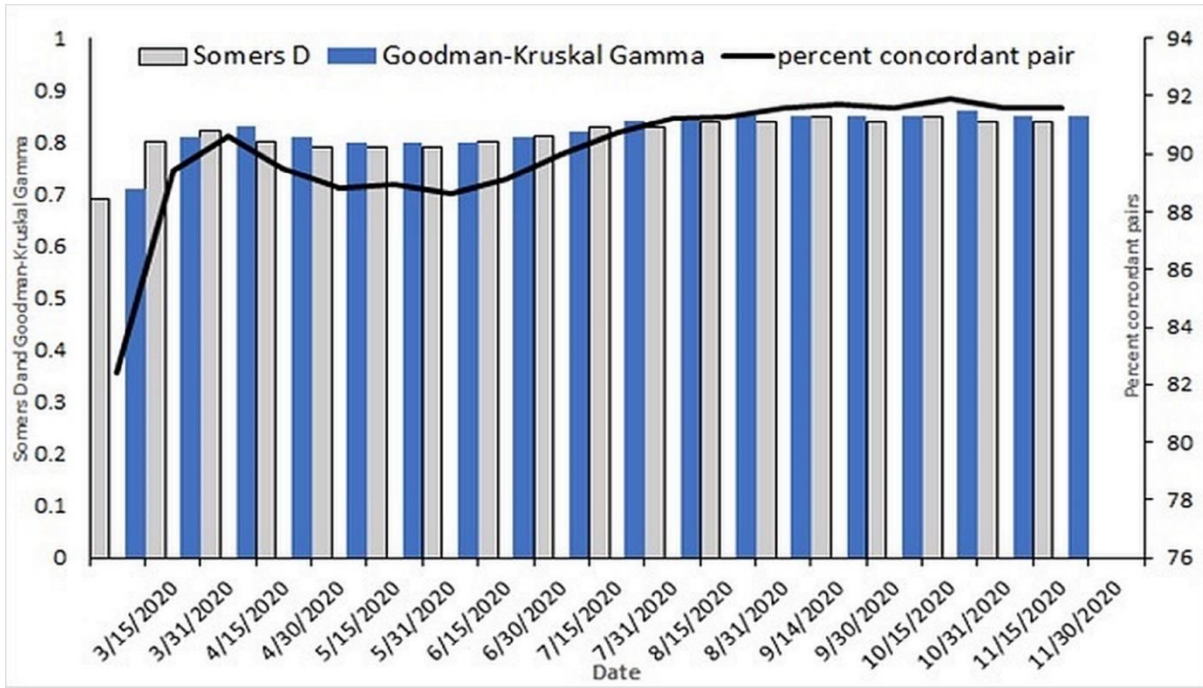

419  
420  
421  
422  
423

**Figure 1:** Performance of logistical regression model on a biweekly scale for the entire USA

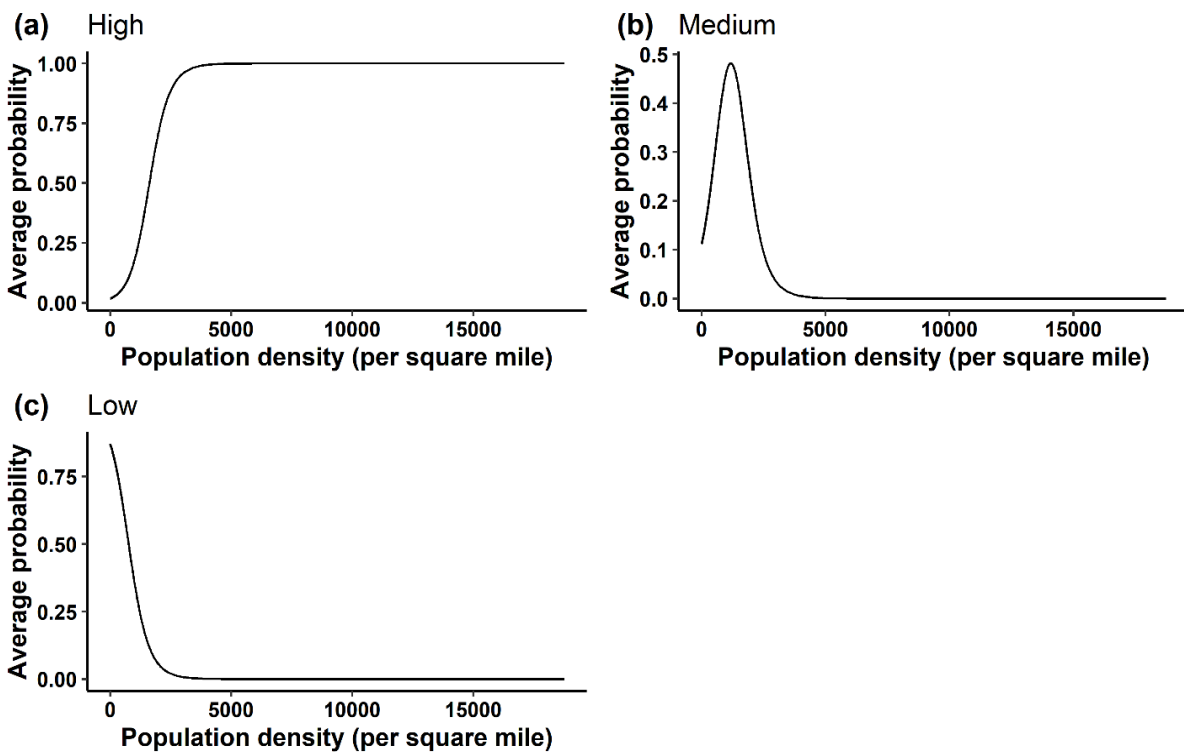

424  
425

426 **Figure 2:** Average probability vs population density for (a) High (b) Medium (c) Low  
427 number of cases, from March 15, 2020, to November 30, 2020

428

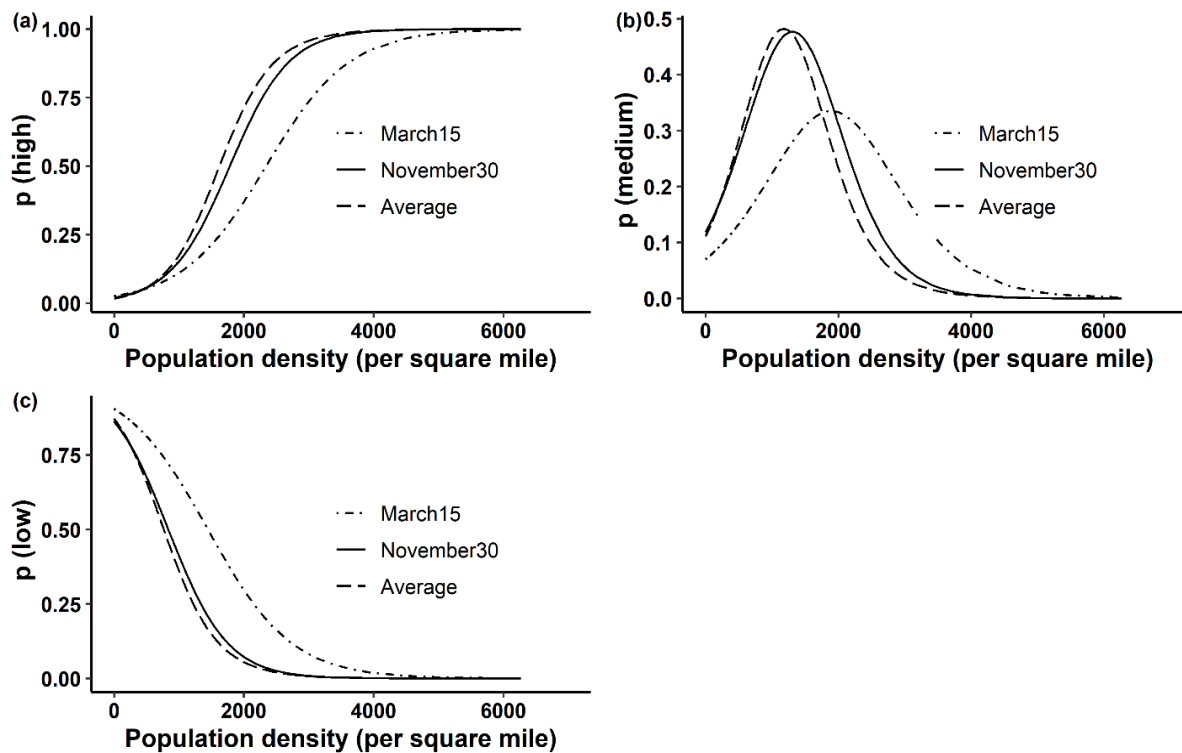

429

430 **Figure 3.** Changes in bi-weekly probability from March 15, 2020, to November 30, 2020 of  
431 (a) high , (b) medium, and (c) low number of cases

432

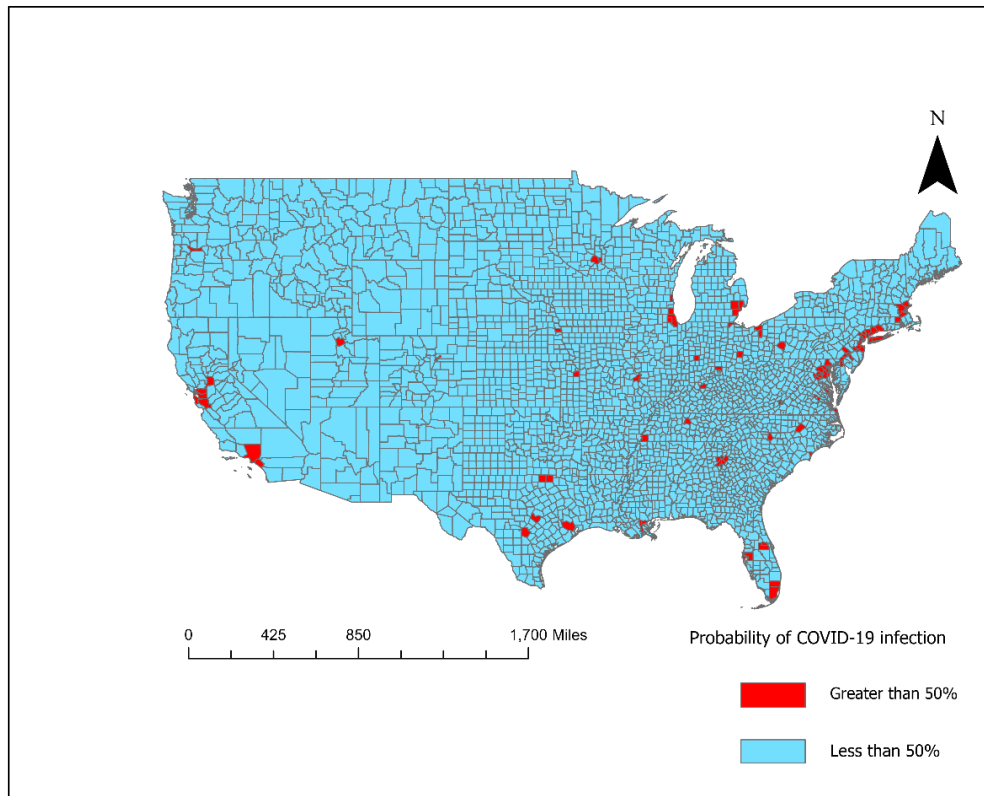

433

434 **Figure 4:** US counties with greater than 50% probability of getting infected as of November  
435 30,2020.

436

437
